# Supplementary material for: Fatty Acid Methyl Esters From the Coral-Associated Bacterium Pseudomonas aeruginosa Inhibit Virulence and Biofilm Phenotypes in Multidrug Resistant Staphylococcus aureus: An in vitro Approach
Source: PubMed Central journal article supplement (PMC8023275; doi:10.3389/fmicb.2021.631853), 2021-03-23
Supplement: Data_Sheet_1.pdf [file Data_Sheet_1.pdf]

## SUPPLEMENTARY DATA

### **Fatty acid methyl esters from the coral-associated bacterium *Pseudomonas aeruginosa* inhibits virulence and biofilm phenotypes in multidrug resistant *Staphylococcus aureus*: An in vitro approach**

Vijay Karuppiah<sup>1,3</sup>, G Seghal Kiran<sup>2</sup>, S Divya<sup>1</sup>, Kavitha Thangavel<sup>3</sup>, Sathiamoorthi Thangavelu<sup>3</sup>, Ranjithkumar Dhandapani<sup>3</sup>, Joseph Selvin<sup>1\*</sup>

<sup>1</sup>Department of Microbiology, School of Life Sciences, Pondicherry University, Puducherry, India.

<sup>2</sup>Department of Food Science and Technology, School of Life Sciences, Pondicherry University, Puducherry, India.

<sup>3</sup>Department of Microbiology, School of Biological Sciences, Alagappa University, Karaikudi, Tamil Nadu, India.

#### **Correspondence Author**

Prof. Dr. Joseph Selvin Ph.D., FNAAS,

Head,

Department of Microbiology,

School of Life Sciences,

Pondicherry University (A Central University),

Puducherry, India.

Email: [josephselvinss@gmail.com](mailto:josephselvinss@gmail.com)

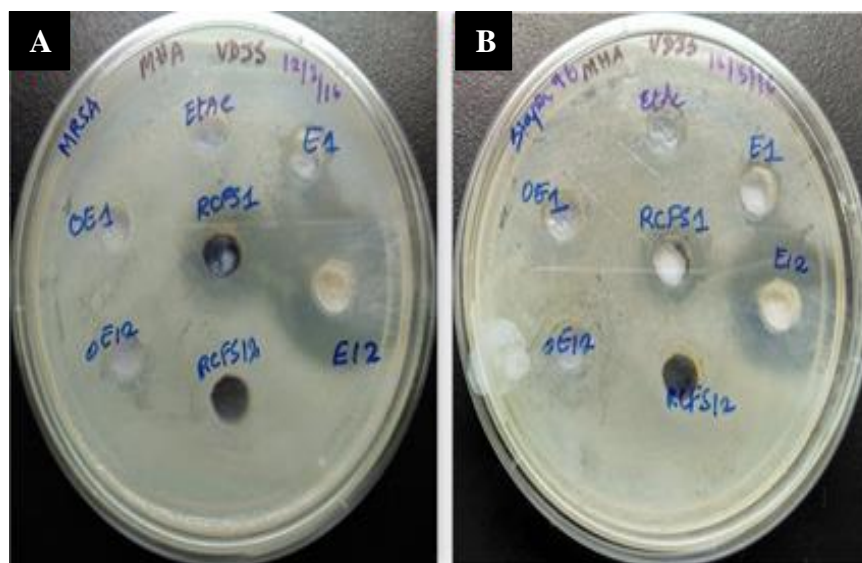

**Suppl. Figure 1** Antibacterial activity of the extracts against *S. aureus* strains. MHA plates show the antibacterial activity of ethyl acetate extracts CBE12 against CA-MRSA (A) and MTCC96 (B). Control wells were loaded with ethyl acetate.

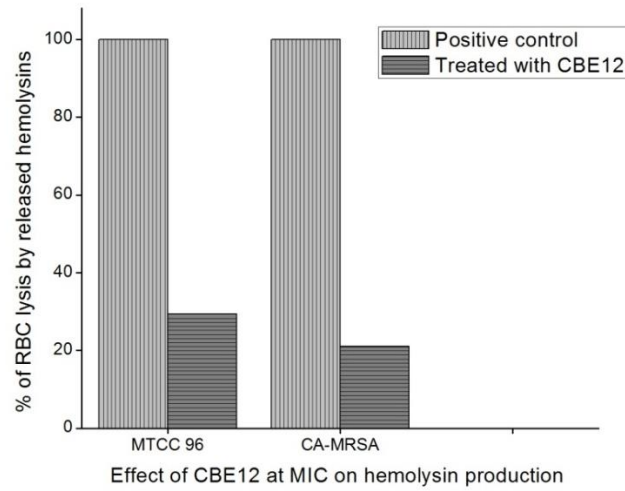

**Suppl. Figure 2** Total Hemolysis Assay. Percentage of RBC lysis as estimated by released Hemoglobin OD at 530 nm in control and CBE12 treated *S. aureus* strains.

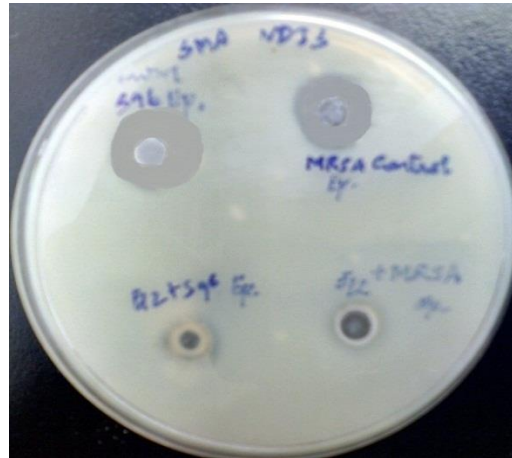

**Suppl. Figure 3** Skim milk agar wells loaded with extracellular products (ECP) from *S. aureus* MTCC96 and CA-MRSA. Inhibition of protease production indicated by the decreased zone of casein hydrolysis compared to the controls (without CBE12 treatment).

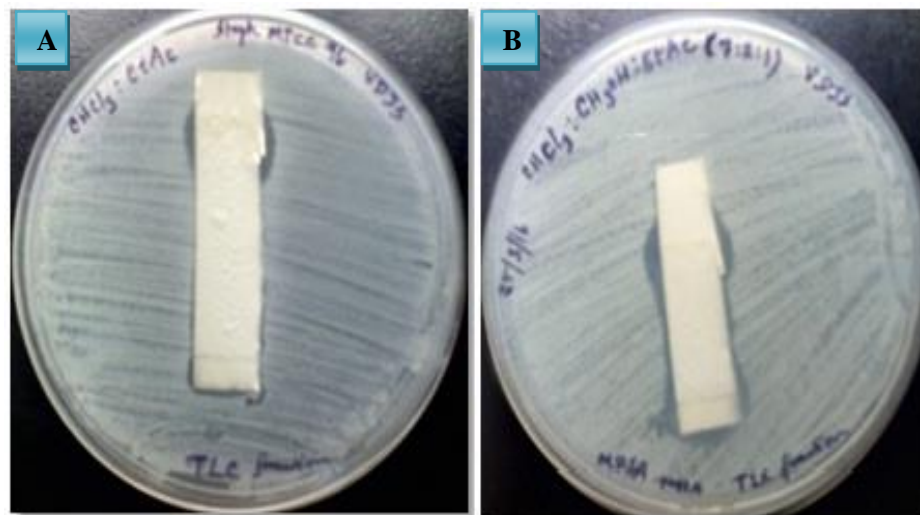

**Suppl. Figure 4** Antibacterial activity of compounds in the coral associated bacterial extract CBE12 separated on TLC plates against MTCC96 (A) and CA-MRSA (B).

PROTON CDC13 {D:\RV} KOPAL 1

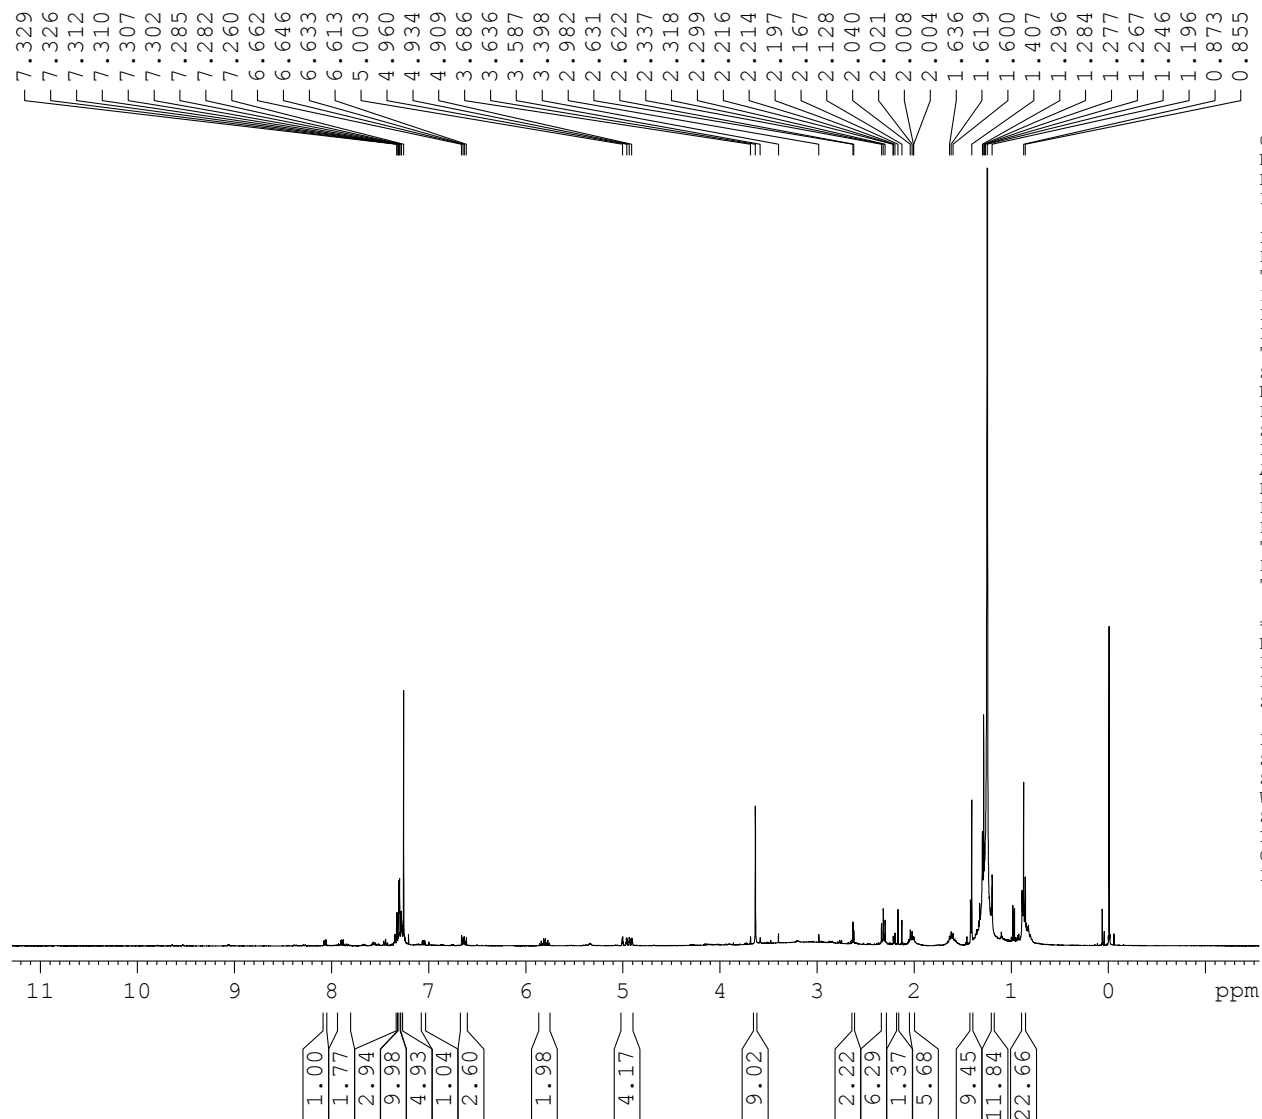

Current Data Parameters  
NAME CBMGL-E-12  
EXPNO 1  
PROCNO 1

F2 - Acquisition Parameters  
Date\_ 20160628  
Time\_ 11.34  
INSTRUM spect  
PROBHD 5 mm DUL 13C-1  
PULPROG zg30  
TD 65536  
SOLVENT CDC13  
NS 36  
DS 2  
SWH 8223.685 Hz  
FIDRES 0.125483 Hz  
AQ 3.9846387 sec  
RG 203  
DW 60.800 usec  
DE 6.00 usec  
TE 295.0 K  
D1 1.00000000 sec  
TD0 1

==== CHANNEL f1 =====  
NUC1 1H  
P1 11.42 usec  
PL1 -3.00 dB  
SFO1 400.1324710 MHz

F2 - Processing parameters  
SI 32768  
SF 400.1300051 MHz  
WDW EM  
SSB 0  
LB 0.30 Hz  
GB 0  
PC 1.00

**Suppl. Figure 5**  $^1\text{H}$  NMR spectrum of partially purified active extract CBE 12 from the coral associated *Pseudomonas aeruginosa* strain CBMGL12

C13CPD CDC13 {D:\RV} KOPAL 1

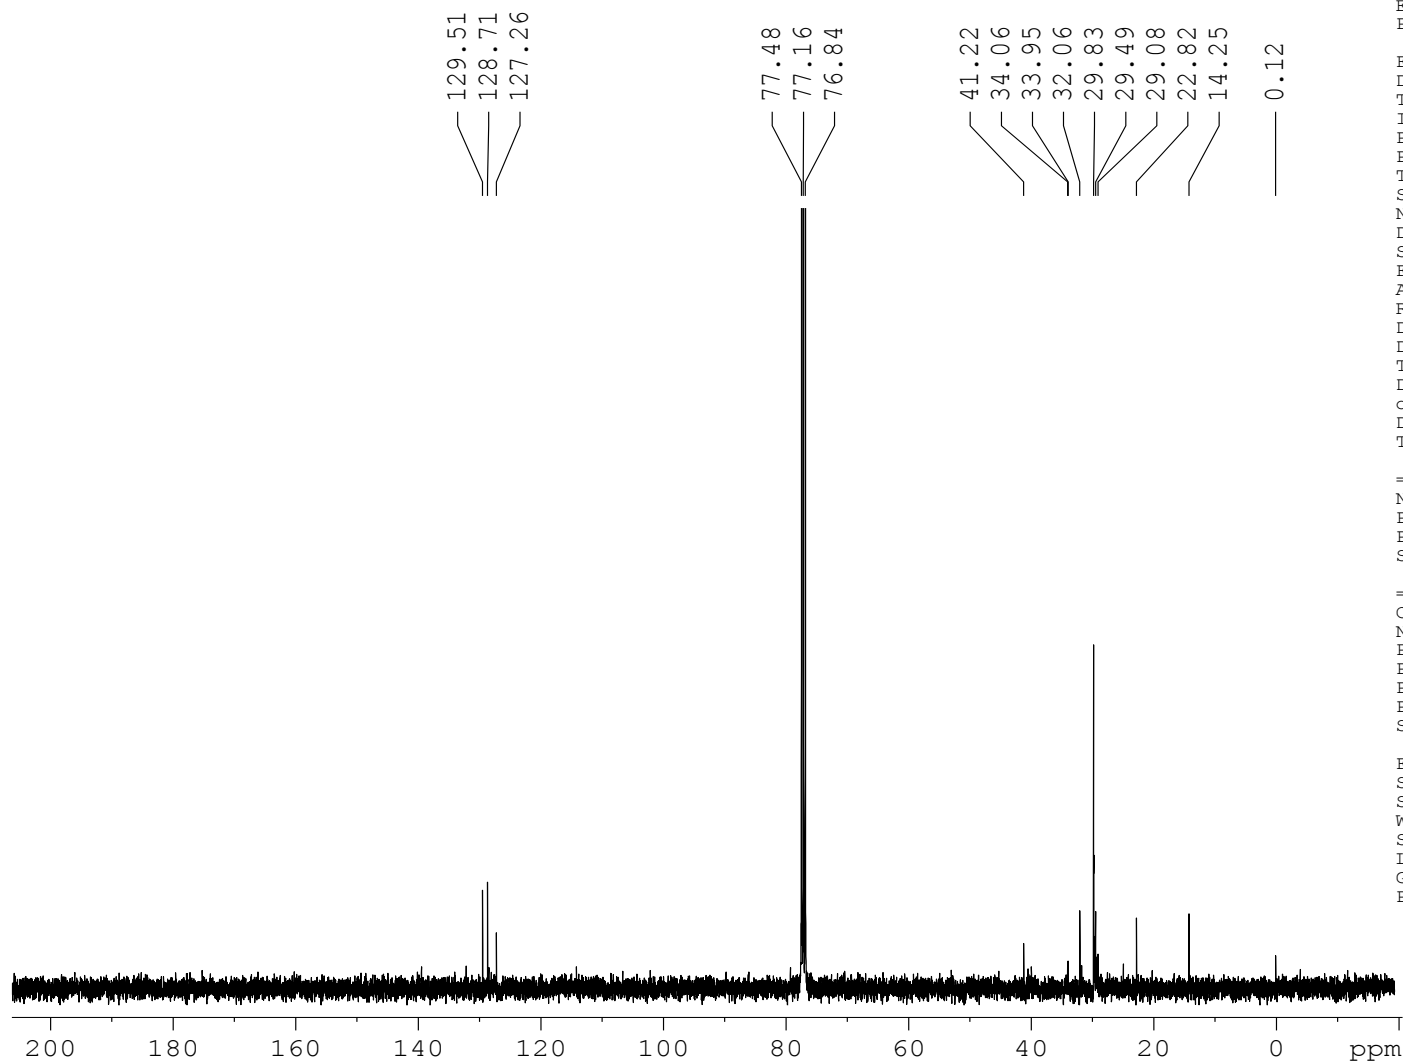

Current Data Parameters  
NAME CBMGL-E-12  
EXPNO 2  
PROCNO 1

F2 - Acquisition Parameters  
Date\_ 20160628  
Time\_ 11.38  
INSTRUM spect  
PROBHD 5 mm DUL 13C-1  
PULPROG zgpg30  
TD 65536  
SOLVENT CDC13  
NS 512  
DS 4  
SWH 24038.461 Hz  
FIDRES 0.366798 Hz  
AQ 1.3631988 sec  
RG 32  
DW 20.800 usec  
DE 6.00 usec  
TE 295.5 K  
D1 2.00000000 sec  
d11 0.03000000 sec  
DELTA 1.89999998 sec  
TD0 1

==== CHANNEL f1 =====  
NUC1 13C  
P1 9.15 usec  
PL1 0.00 dB  
SFO1 100.6228298 MHz

==== CHANNEL f2 =====  
CPDPRG2 waltz16  
NUC2 1H  
PCPD2 90.00 usec  
PL12 14.90 dB  
PL13 14.90 dB  
PL2 -3.00 dB  
SFO2 400.1316005 MHz

F2 - Processing parameters  
SI 32768  
SF 100.6127544 MHz  
WDW EM  
SSB 0  
LB 1.00 Hz  
GB 0  
PC 1.40

**Suppl. Figure 6**  $C^{13}$  NMR spectrum of partially purified active extract CBE 12 from the coral associated *Pseudomonas aeruginosa* strain CBMGL12

**Suppl. Table 1** Biochemical identification of the producer bacterium *Pseudomonas aeruginosa* strain CBMGL12

| <b>Characteristics</b> | <b>Observation</b>                          |
|------------------------|---------------------------------------------|
| Gram Staining          | Gram Negative Rods                          |
| Catalase               | Positive                                    |
| Oxidase                | Positive                                    |
| Nutrient agar          | Green colonies                              |
| Cetrimide agar         | Luxuriant yellowish Green with fluorescence |
| TCBS agar              | Bluish green colonies                       |
| EMB agar               | No growth                                   |
| Motility               | Motile                                      |

**Suppl. Table 2** Percentage of hemolysin inhibition in MTCC 96 by HPLC fractions

| <b>Fraction ID</b>    | <b>Hemolysin inhibition (%)</b> |
|-----------------------|---------------------------------|
| FA1                   | 5.52                            |
| FA2                   | 0.0                             |
| FB1                   | 6.5                             |
| FB2                   | 0.0                             |
| FC1                   | 6.72                            |
| FC2                   | 0.0                             |
| FD1                   | 7.22                            |
| Column fraction(CFA2) | 5.77                            |



**Suppl. Table 3** Percentage of hemolysin inhibition in CA-MRSA by HPLC fractions

| <b>Fraction ID</b>     | <b>Hemolysin inhibition (%)</b> |
|------------------------|---------------------------------|
| FA1                    | 16.42                           |
| FA2                    | 11.58                           |
| FB1                    | 16.23                           |
| FB2                    | 11.98                           |
| FC1                    | 11.95                           |
| FC2                    | 12.42                           |
| FD1                    | 11.39                           |
| Column fraction (CFA2) | 14.48                           |
